# Supplementary material for: iNOS Gene Ablation Prevents Liver Fibrosis in Leptin-Deficient ob/ob Mice
Source: MDPI journal article supplement (doi:10.3390/genes10030184), 2019-02-27
Supplement: s1 [file s1]

**Supplemental table 1.** Sequences of the primers and TaqMan® probes.

| Gene (GenBank accession number) | Oligonucleotide sequence (5'-3')           |
|---------------------------------|--------------------------------------------|
| <i>Tnc</i> (NM_011607)          |                                            |
| Forward                         | AAGAGCCAGCAAGCCACAAC                       |
| Reverse                         | ACAGCAGAAACACCAATCCCATA                    |
| TaqMan® Probe                   | FAM-ACCACACTCACAGGTCTAAGGCCCGG-TAMRA       |
| <i>Tnf</i> (NM_013693)          |                                            |
| Forward                         | CCAGACCCTCACACTCAGATCAT                    |
| Reverse                         | ACTCCAGCTGCTCCTCCACTT                      |
| TaqMan® Probe                   | FAM-CCTGTAGCCACGTCGTAGCAAACCA-TAMRA        |
| <i>Hif1a</i> (NM_010431)        |                                            |
| Forward                         | TACCACACTGAGGTTGGTTACTGT                   |
| Reverse                         | AACTAGCCGAGGAAGAACTATGAACA                 |
| TaqMan® Probe                   | FAM- AACATGGAAGGTATTGCACTGCACAGGC-TAMRA    |
| <i>Col6a3</i> (NM_001243008)    |                                            |
| Forward                         | TGATGGCACCTCTCAGGACTCT                     |
| Reverse                         | TTGTCGGAGCCATCCAAAAG                       |
| TaqMan® Probe                   | FAM-CCACGGAAGTTCACGTAA-TAMRA               |
| <i>Col6a1</i> (NM_009933)       |                                            |
| Forward                         | CACCTGGGCCAGATGAGTGT                       |
| Reverse                         | CCAGCACGAAGAGGATGTCAA                      |
| TaqMan® Probe                   | FAM-AAATGTGCTCCTGCTGTGA-TAMRA              |
| <i>Colla1</i> (NM_007742)       |                                            |
| Forward                         | TGTCCCAACCCCCAAAGAC                        |
| Reverse                         | GGTCCCTCGACTCCTACATCTTC                    |
| TaqMan® Probe                   | FAM-CTGCCCCGGAAGAATACGTATCACCAAACCTC-TAMRA |
| <i>Itgax</i> (NM_021334)        |                                            |
| Forward                         | CTGGACTTTGTTAAAGCTGTGATGAG                 |
| Reverse                         | GACGTGGAGATGAAGTTGTTGAAA                   |
| TaqMan® Probe                   | FAM-CCTAGCACACACGGTTCTCCCTGATGCA-TAMRA     |
| <i>Cd44</i> (NM_009851)         |                                            |
| Forward                         | AGAGCCGGAAGAAGACGAAAAC                     |
| Reverse                         | TCCACCTCTTCTTGCATCTTTAGC                   |
| TaqMan® Probe                   | FAM-CCACGGAAGTTCACGTAA-TAMRA               |

|                           |                                        |  |
|---------------------------|----------------------------------------|--|
| <i>Emr1</i> (NM_010130)   |                                        |  |
| Forward                   | CAAGATTCTCTTCCTCACCGGTAT               |  |
| Reverse                   | GCAGGCGAGGAAAAGATAGTGTAG               |  |
| TaqMan <sup>®</sup> probe | FAM-CAACCAGACGGCTTGTGCCATCATT-TAMRA    |  |
| <i>Tlr4</i> (NM_021297)   |                                        |  |
| Forward                   | TGATGGCACCTCTCAGGACTCT                 |  |
| Reverse                   | TTGTCGGAGCCATCCAAAAG                   |  |
| TaqMan <sup>®</sup> Probe | FAM-CACCCAGCTGGCAGAGGCATACTTGT-TAMRA   |  |
| <i>Mmp9</i> (NM_013599)   |                                        |  |
| Forward                   | CCAAAGACCTGAAAACCTCCAA                 |  |
| Reverse                   | GCCCCGGGTGTAACCATAGC                   |  |
| TaqMan <sup>®</sup> Probe | FAM-CCACCCAGCTGGCAGAGGCATACTTGT-TAMRA  |  |
| <i>Acta2</i> (NM_009338)  |                                        |  |
| Forward                   | GGCCACACGAAGCTGTTATAG                  |  |
| Reverse                   | GTATCCGATAGAACACGGCATCA                |  |
| TaqMan <sup>®</sup> Probe | FAM-CATGGAAAAGATCTGGC-TAMRA            |  |
| <i>Spp1</i> (NM_009632)   |                                        |  |
| Forward                   | TTTGCCGTTTGGCATTGC                     |  |
| Reverse                   | TGGGTGCAGGCTGTAAAGCT                   |  |
| TaqMan <sup>®</sup> Probe | FAM- TCCTCCCTCCCGGTGAAAGT-TAMRA        |  |
| <i>Tgfb</i> (NM_011480)   |                                        |  |
| Forward                   | TCCCAAGAGCCCTGCACTT                    |  |
| Reverse                   | TCCCAAGAGCCCTGCACTT                    |  |
| TaqMan <sup>®</sup> Probe | FAM- TTGACACGTTTCTTCCTGAGCAGCGC -TAMRA |  |

---

*Tnc*: tenascin C; *Tnf*, tumor necrosis factor  $\alpha$ ; *Hifa*: hypoxia inducible factor 1,  $\alpha$  subunit; *Colla1*, collagen, type I,  $\alpha 1$ ; *Col6a1*, collagen, type VI,  $\alpha 1$ ; *Col6a3*, collagen, type VI,  $\alpha 3$ ; *Itgax*, integrin  $\alpha$  X (Cd11c); *Cd44*, Cd44 antigen; *Emr1*, egf-like module containing, mucin-like *Tlr4*: Toll like receptor 4; *Mmp9*, matrix metalloproteinase 9; *Acta2*, actin,  $\alpha 2$ ; *Spp1*, secreted phosphoprotein 1; *Tgfb1*, transforming growth factor,  $\beta 1$ .

**Supplemental table 2.** Metabolic characteristics of 12-week-old experimental animals.

|                     | Wild type     | <i>ob/ob</i> + PBS           | <i>ob/ob</i> + leptin             | <i>ob/ob</i> pair-fed          |
|---------------------|---------------|------------------------------|-----------------------------------|--------------------------------|
| Body weight (g)     | 24.0 ± 0.4    | 44.9 ± 1.5 <sup>***</sup>    | 24.8 ± 0.9 <sup>††,##</sup>       | 35.3 ± 1.0 <sup>*</sup>        |
| Liver weight (g)    | 1.04 ± 0.02   | 3.15 ± 0.12 <sup>***</sup>   | 1.12 ± 0.08 <sup>††,##</sup>      | 1.30 ± 0.04 <sup>**</sup>      |
| FFA (mmol/L)        | 0.74 ± 0.08   | 1.07 ± 0.06 <sup>***</sup>   | 0.77 ± 0.07 <sup>*,##</sup>       | 1.60 ± 1.6 <sup>*</sup>        |
| TG (mg/dL)          | 66.3 ± 4.4    | 97.3 ± 5.3 <sup>**</sup>     | 82.8 ± 11.0 <sup>**,†,#</sup>     | 147.9 ± 8.4                    |
| Glycerol (mg/dL)    | 0.025 ± 0.001 | 0.036 ± 0.001 <sup>***</sup> | 0.013 ± 0.003 <sup>**,††,##</sup> | 0.044 ± 0.006 <sup>†, **</sup> |
| Glucose (mg/dL)     | 83 ± 5        | 410 ± 42 <sup>***</sup>      | 175 ± 23 <sup>**,††</sup>         | 169 ± 17 <sup>††, **</sup>     |
| Insulin (ng/mL)     | 0.42 ± 0.04   | 9.66 ± 0.61 <sup>***</sup>   | 0.45 ± 0.08 <sup>*,††, #</sup>    | 2.58 ± 0.57 <sup>†, *</sup>    |
| HOMA                | 1.6 ± 0.2     | 172.3 ± 21.5 <sup>***</sup>  | 3.81 ± 1.1 <sup>*,††, #</sup>     | 20.9 ± 5.8 <sup>††</sup>       |
| Adiponectin (mg/mL) | 22.6 ± 4.1    | 16.6 ± 0.9 <sup>***</sup>    | 39.5 ± 1.6 <sup>*,††</sup>        | 37.0 ± 2.1 <sup>*</sup>        |

FFA, free fatty acids; HOMA, homeostasis model assessment; TG, triacylglycerols. Data are mean ± SEM (n=4-5 per group). Differences between groups were analyzed by Kruskal-Wallis followed by Mann Whitney's *U* tests. \**P*<0.05, \*\**P*<0.01 vs wild type mice. †*P*<0.05, ††*P*<0.01 vs vehicle-treated *ob/ob* mice. #*P*<0.05, ##*P*<0.01 vs pair-fed *ob/ob* mice.
