# Supplementary material for: iNOS Gene Ablation Prevents Liver Fibrosis in Leptin-Deficient ob/ob Mice
Source: MDPI journal article supplement (doi:10.3390/genes10030184), 2019-02-27
Supplement: s1 [file s1]

## Supplemental Figure 1

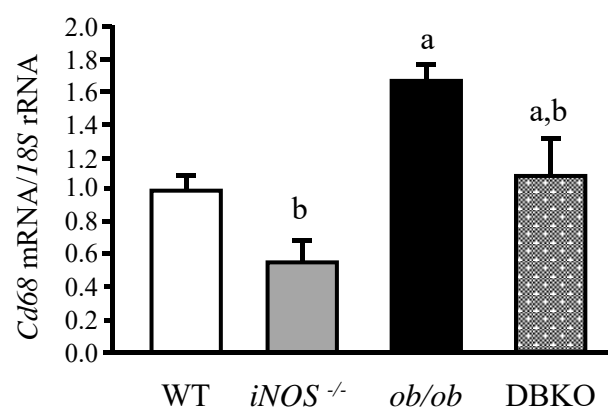

**Supplemental Figure 1. Gene expression levels of *Cd68* in the liver.** Leptin-deficient *ob/ob* mice exhibited a significantly increase in *Cd68* mRNA levels compared to wild type mice, with *iNOS* disruption reducing *Cd68* transcripts levels. Values are mean  $\pm$  SEM (n=5 per group). The gene expression in WT mice was assumed to be 1. Differences between groups were analyzed by two-way ANOVA. <sup>a</sup> $P < 0.05$  effect of the absence of the *ob* gene. <sup>b</sup> $P < 0.05$  effect of the absence of the *iNOS* gene.

## Supplemental Figure 2

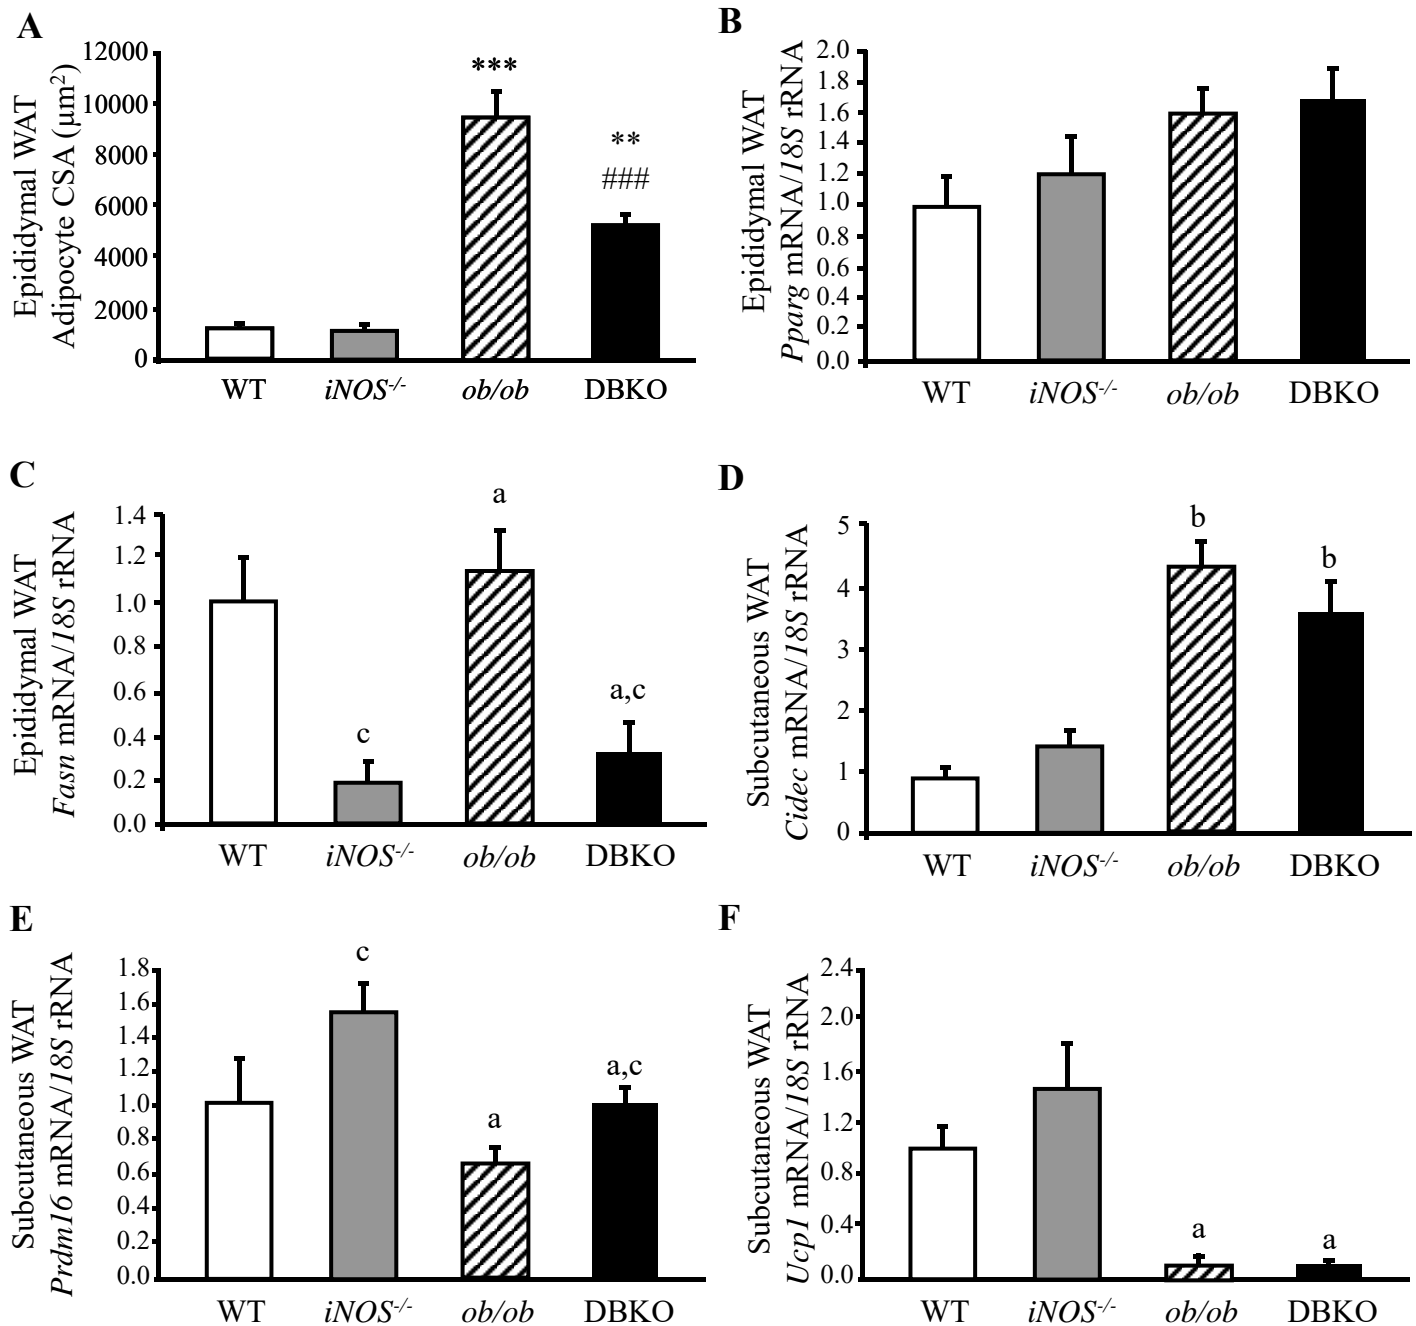

**Supplemental Figure 2. Impact of iNOS deletion on markers of adipogenesis and fat browning in the context of leptin deficiency.** (A) Adipocyte cell surface area in epididymal WAT (n=4-5 per group). Gene expression levels of markers of adipogenesis *Pparg* (B) and *Fasn* (C) in epididymal WAT and *Cidec* (D) in subcutaneous WAT as well as markers of fat browning *Prdm16* (E) and *Ucp1* (F) in subcutaneous WAT of experimental animals (n=6 per group). The gene expression levels in wild type was assumed to be 1. Differences between groups were analyzed by two-way ANOVA or one-way ANOVA followed by Tukey's *post hoc* test when an interaction between factors was detected. <sup>a</sup>*p*<0.05, <sup>b</sup>*p*<0.001 effect of the absence of *ob* gene, <sup>c</sup>*p*<0.01 effect of the absence of the *iNOS* gene. \*\*\**p*<0.001 vs WT mice; ###*p*<0.01 vs *ob/ob* mice.

## Supplemental Figure 3

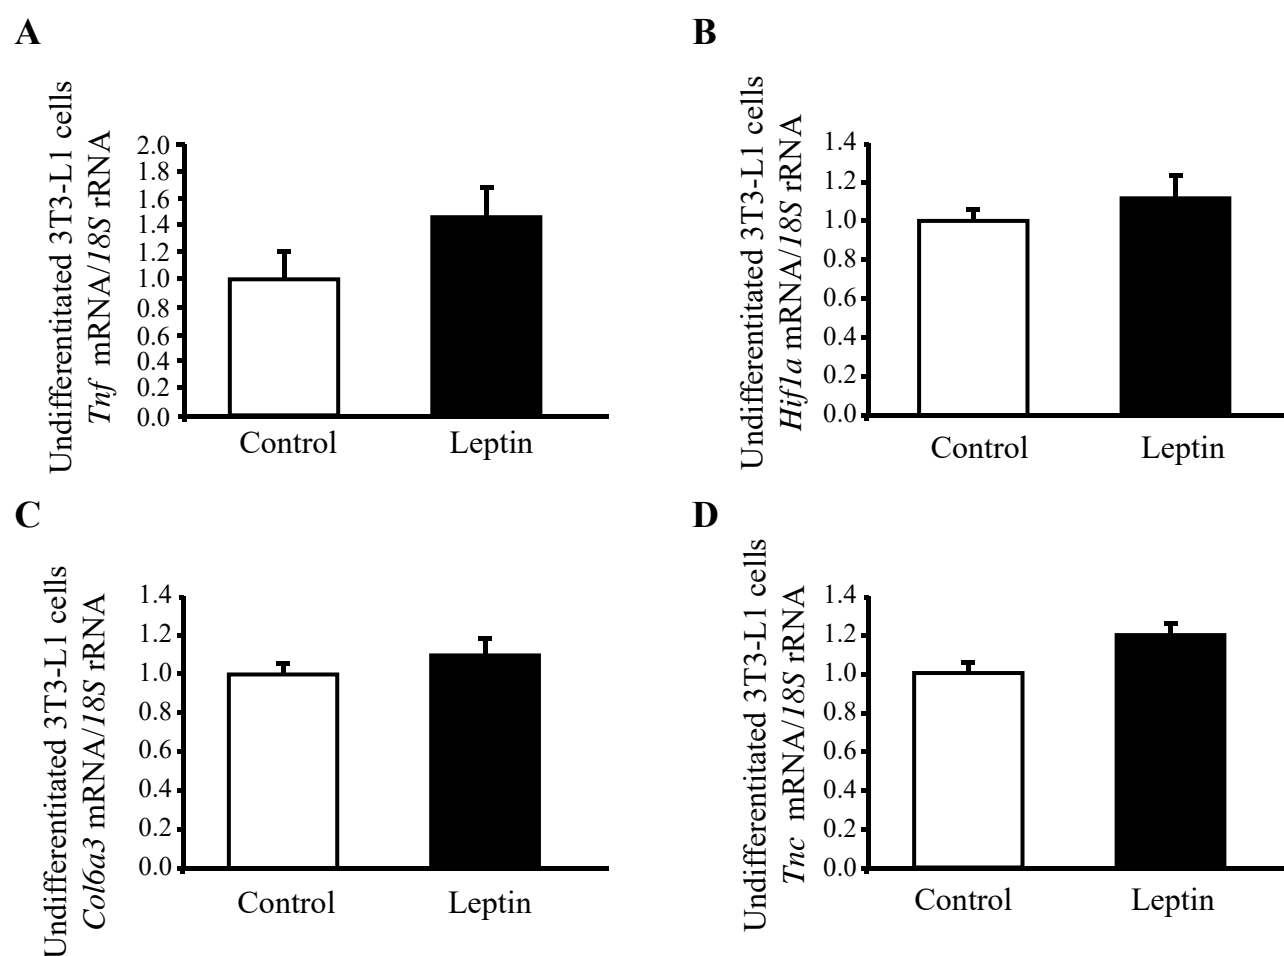

**Supplemental Figure 3. Effect of leptin treatment on the expression of markers of inflammation and fibrosis in undifferentiated 3T3-L1 cells.** mRNA expression levels of *Tnf* (A), *Hif1a* (B), *Col6a3* (C) and *Tnc* (D) in undifferentiated 3T3-L1 preadipocytes under basal conditions and after leptin (10 nmol L<sup>-1</sup>) treatment for 24 h. The gene expression levels in unstimulated cells was assumed to be 1. Values are the mean  $\pm$  SEM (n=6 per group). Differences between groups were analyzed by unpaired two-tailed Student's *t* tests.

## Supplemental Figure 4

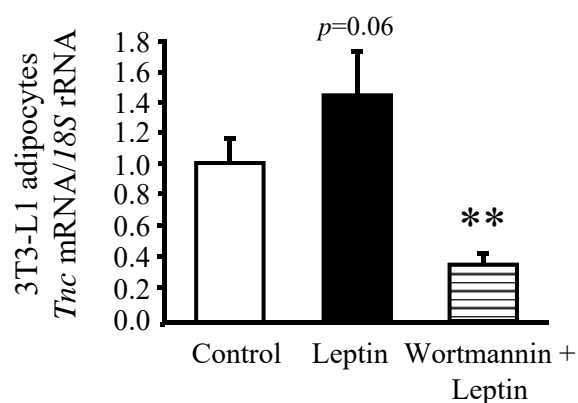

### Supplemental Figure 4. Effect of leptin on *Tnc* gene expression in the presence of a PI3K inhibitor.

*Tnc* transcript levels in 3T3-L1 adipocytes stimulated with leptin (10 nmol L<sup>-1</sup>) in the absence or presence of PI3K inhibitor wortmannin (10 mmol L<sup>-1</sup>) for 24 h. Gene expression levels in the unstimulated cells were assumed to be 1. Values are the mean  $\pm$  SEM (n=5 per group). Differences between groups were analyzed by unpaired two-tailed Student's *t* tests. \*\* $p<0.01$  vs unstimulated cells.
